# Supplementary material
Source: publisher site journal article supplement (https://www.dovepress.com/article/186004)
Supplement: Supplementary file 1 [file get_supplementary_file.php%3Ff%3D186004.pdf]

---

# Do etoricoxib and indometacin have similar effects and safety for gouty arthritis?

A meta-analysis of randomized controlled trials

**(Supplementary materials)**

---

**Table S1 Database and search strategy**

| Database           | Syntax                                                                                                                                                                                                                                                                                                                                                                                                                                                                                                                                                                                                                                                                                                                                                                                                                                                                                                                                                                                                                                                                                                                                                                                                                                                                                                                                                                                                                                                                                                                                                                                                                                                                                                                                                                                                                                                                                                                                                                                                                                                                                                                                                                                                                                                                                                                                                                                                                                                                                                                                                                                                                                                                                                                                                                                                                                                                                                                                                                                                                                                                                                                                                                                                                                                                                                                                                                                                                                                                                                                                                                                                                                                                                                                                                                                                                                                                                                                                                                                                                                                                                                                                                                                                                                                                                                                                                                                                                                                                                                                                                                                                                                                                                                                                                                                                                                                                                                                                                                                                                                                                                                                                                                                                                                                                                                                                                                                                                                                                                                                                                                                                                                                                                                                                                                                                                                                                                                                                                                                                                                                                                                                                                                                                                                                                                                                                                                                                                                                                                                                                                                                                                                                                                                                                                                                                                                                                                                                                                               |
|--------------------|----------------------------------------------------------------------------------------------------------------------------------------------------------------------------------------------------------------------------------------------------------------------------------------------------------------------------------------------------------------------------------------------------------------------------------------------------------------------------------------------------------------------------------------------------------------------------------------------------------------------------------------------------------------------------------------------------------------------------------------------------------------------------------------------------------------------------------------------------------------------------------------------------------------------------------------------------------------------------------------------------------------------------------------------------------------------------------------------------------------------------------------------------------------------------------------------------------------------------------------------------------------------------------------------------------------------------------------------------------------------------------------------------------------------------------------------------------------------------------------------------------------------------------------------------------------------------------------------------------------------------------------------------------------------------------------------------------------------------------------------------------------------------------------------------------------------------------------------------------------------------------------------------------------------------------------------------------------------------------------------------------------------------------------------------------------------------------------------------------------------------------------------------------------------------------------------------------------------------------------------------------------------------------------------------------------------------------------------------------------------------------------------------------------------------------------------------------------------------------------------------------------------------------------------------------------------------------------------------------------------------------------------------------------------------------------------------------------------------------------------------------------------------------------------------------------------------------------------------------------------------------------------------------------------------------------------------------------------------------------------------------------------------------------------------------------------------------------------------------------------------------------------------------------------------------------------------------------------------------------------------------------------------------------------------------------------------------------------------------------------------------------------------------------------------------------------------------------------------------------------------------------------------------------------------------------------------------------------------------------------------------------------------------------------------------------------------------------------------------------------------------------------------------------------------------------------------------------------------------------------------------------------------------------------------------------------------------------------------------------------------------------------------------------------------------------------------------------------------------------------------------------------------------------------------------------------------------------------------------------------------------------------------------------------------------------------------------------------------------------------------------------------------------------------------------------------------------------------------------------------------------------------------------------------------------------------------------------------------------------------------------------------------------------------------------------------------------------------------------------------------------------------------------------------------------------------------------------------------------------------------------------------------------------------------------------------------------------------------------------------------------------------------------------------------------------------------------------------------------------------------------------------------------------------------------------------------------------------------------------------------------------------------------------------------------------------------------------------------------------------------------------------------------------------------------------------------------------------------------------------------------------------------------------------------------------------------------------------------------------------------------------------------------------------------------------------------------------------------------------------------------------------------------------------------------------------------------------------------------------------------------------------------------------------------------------------------------------------------------------------------------------------------------------------------------------------------------------------------------------------------------------------------------------------------------------------------------------------------------------------------------------------------------------------------------------------------------------------------------------------------------------------------------------------------------------------------------------------------------------------------------------------------------------------------------------------------------------------------------------------------------------------------------------------------------------------------------------------------------------------------------------------------------------------------------------------------------------------------------------------------------------------------------------------------------------------------------------------|
| Cochrane<br>n = 13 | (gout or gouty or Gouty arthritis or uric arthritis or arthralgia) AND Etoricoxib AND (indometacin or indomethacin)                                                                                                                                                                                                                                                                                                                                                                                                                                                                                                                                                                                                                                                                                                                                                                                                                                                                                                                                                                                                                                                                                                                                                                                                                                                                                                                                                                                                                                                                                                                                                                                                                                                                                                                                                                                                                                                                                                                                                                                                                                                                                                                                                                                                                                                                                                                                                                                                                                                                                                                                                                                                                                                                                                                                                                                                                                                                                                                                                                                                                                                                                                                                                                                                                                                                                                                                                                                                                                                                                                                                                                                                                                                                                                                                                                                                                                                                                                                                                                                                                                                                                                                                                                                                                                                                                                                                                                                                                                                                                                                                                                                                                                                                                                                                                                                                                                                                                                                                                                                                                                                                                                                                                                                                                                                                                                                                                                                                                                                                                                                                                                                                                                                                                                                                                                                                                                                                                                                                                                                                                                                                                                                                                                                                                                                                                                                                                                                                                                                                                                                                                                                                                                                                                                                                                                                                                                                  |
| Embase<br>n = 99   | ('arthragra'/exp OR 'arthragra' OR 'arthritis urica'/exp OR 'arthritis urica' OR 'arthritis, gouty'/exp OR 'arthritis, gouty' OR 'cheiragra'/exp OR 'cheiragra' OR 'chiragra'/exp OR 'chiragra' OR 'gout'/exp OR 'gout' OR 'gouty arthritis'/exp OR 'gouty arthritis' OR 'gouty attack'/exp OR 'gouty attack' OR 'urate inflammation'/exp OR 'urate inflammation' OR 'uric arthritis'/exp OR 'uric arthritis' OR 'gouty') AND ('5 chloro 2 (2 methyl 5 pyridyl) 3 (4 methylsulfonylphenyl) pyridine'/exp OR '5 chloro 2 (2 methyl 5 pyridyl) 3 (4 methylsulfonylphenyl) pyridine' OR '5 chloro 3 [4 (methylsulfonyl) phenyl] 2 (6 methylpyridin 3 yl) pyridine'/exp OR '5 chloro 3 [4 (methylsulfonyl) phenyl] 2 (6 methylpyridin 3 yl) pyridine' OR '5 chloro 6` methyl 3 [4 (methylsulfonyl) phenyl] 2, 3` bipyridine'/exp OR '5 chloro 6` methyl 3 [4 (methylsulfonyl) phenyl] 2, 3` bipyridine' OR 'arcoxia'/exp OR 'arcoxia' OR 'etoricoxib'/exp OR 'etoricoxib' OR 'etoricoxib hydrochloride'/exp OR 'etoricoxib hydrochloride' OR '1 791456'/exp OR '1 791456' OR '1791456'/exp OR '1791456' OR 'mk 0663'/exp OR 'mk 0663' OR 'mk 663'/exp OR 'mk 663' OR 'mk0663'/exp OR 'mk0663' OR 'mk663'/exp OR 'mk663' OR 'nucoxia'/exp OR 'nucoxia') AND ('1 (4 chlorobenzoyl) 5 methoxy 2 methyl 3 indoleacetic acid'/exp OR '1 (4 chlorobenzoyl) 5 methoxy 2 methyl 3 indoleacetic acid' OR '1 (4 chlorobenzoyl) 5 methoxy 2 methylindole 3 acetic acid'/exp OR '1 (4 chlorobenzoyl) 5 methoxy 2 methylindole 3 acetic acid' OR '1 (para chlorobenzoyl) 5 methoxy 2 methyl 3 indoleacetic acid'/exp OR '1 (para chlorobenzoyl) 5 methoxy 2 methyl 3 indoleacetic acid' OR '1 (para chlorobenzoyl) 5 methoxy 2 methyl indole 3 acetic acid'/exp OR '1 (para chlorobenzoyl) 5 methoxy 2 methyl indole 3 acetic acid' OR '1 p chlorobenzylidene 5 methoxy 2 methyl 3 indoneacetic acid'/exp OR '1 p chlorobenzylidene 5 methoxy 2 methyl 3 indoneacetic acid' OR 'algiflam'/exp OR 'algiflam' OR 'algometacin'/exp OR 'algometacin' OR 'amuno'/exp OR 'amuno' OR 'amuno retard'/exp OR 'amuno retard' OR 'antalgin dialicels'/exp OR 'antalgin dialicels' OR 'apo-indomethacin'/exp OR 'apo-indomethacin' OR 'areumatin'/exp OR 'areumatin' OR 'argilex'/exp OR 'argilex' OR 'arthrexin'/exp OR 'arthrexin' OR 'articulen'/exp OR 'articulen' OR 'artracin'/exp OR 'artracin' OR 'artrilona s'/exp OR 'artrilona s' OR 'artrinoval'/exp OR 'artrinoval' OR 'artrocid'/exp OR 'artrocid' OR 'asimet'/exp OR 'asimet' OR 'benocid'/exp OR 'benocid' OR 'betacin'/exp OR 'betacin' OR 'bonidon'/exp OR 'bonidon' OR 'boutycin'/exp OR 'boutycin' OR 'catlep'/exp OR 'catlep' OR 'chrononidocid'/exp OR 'chrononidocid' OR 'chrononidocid'/exp OR 'chrononidocid' OR 'chrononidocid' OR 'confortid retardkapseln'/exp OR 'confortid retardkapseln' OR 'docin'/exp OR 'docin' OR 'dolazal'/exp OR 'dolazal' OR 'dolazol'/exp OR 'dolazol' OR 'dolcidium'/exp OR 'dolcidium' OR 'dometin'/exp OR 'dometin' OR 'durametacin'/exp OR 'durametacin' OR 'elmego spray'/exp OR 'elmego spray' OR 'elmetacin'/exp OR 'elmetacin' OR 'endometacin'/exp OR 'endometacin' OR 'flamaret'/exp OR 'flamaret' OR 'flexin continus'/exp OR 'flexin continus' OR 'grindocin'/exp OR 'grindocin' OR 'helvecin'/exp OR 'helvecin' OR 'idicin'/exp OR 'idicin' OR 'im-75'/exp OR 'im-75' OR 'imbrilon'/exp OR 'imbrilon' OR 'imet'/exp OR 'imet' OR 'inacid'/exp OR 'inacid' OR 'indacin'/exp OR 'indacin' OR 'indalgin'/exp OR 'indalgin' OR 'inderapollon'/exp OR 'inderapollon' OR 'indocin'/exp OR 'indocin' OR 'indo phlogont'/exp OR 'indo phlogont' OR 'indo-lemmon'/exp OR 'indo-lemmon' OR 'indo-phlogont'/exp OR 'indo-phlogont' OR 'indo-tablinen'/exp OR 'indo-tablinen' OR 'indocap'/exp OR 'indocap' OR 'indocap s.r.'/exp OR 'indocap s.r.' OR 'indocid'/exp OR 'indocid' OR 'indocid r'/exp OR 'indocid r' OR 'indocid retard'/exp OR 'indocid retard' OR 'indocid-r'/exp OR 'indocid-r' OR 'indocin'/exp OR 'indocin' OR 'indocin i.v.'/exp OR 'indocin i.v.' OR 'indocin sr'/exp OR 'indocin sr' OR 'indocolir'/exp OR 'indocolir' OR 'indocollyre'/exp OR 'indocollyre' OR 'indogesic'/exp OR 'indogesic' OR 'indolag'/exp OR 'indolag' OR 'indolar sr'/exp OR 'indolar sr' OR 'indolemmon'/exp OR 'indolemmon' OR 'indomecin'/exp OR 'indomecin' OR 'indomed'/exp OR 'indomed' OR 'indomee f'/exp OR 'indomee f' OR 'indomee'/exp OR 'indomee' OR 'indomelan'/exp OR 'indomelan' OR 'indomelol'/exp OR 'indomelol' OR 'indomet retard'/exp OR 'indomet retard' OR 'indometacin'/exp OR 'indometacin' OR 'indometacin sodium'/exp OR 'indometacin sodium' OR 'indometacin sodium trihydrate'/exp OR 'indometacin sodium trihydrate' OR 'indometacine'/exp OR 'indometacine' OR 'indomethacin'/exp OR 'indomethacin' OR 'indomethacin sodium'/exp OR 'indomethacin sodium' OR 'indomethacine'/exp OR 'indomethacine' OR 'indomethacinum'/exp OR 'indomethacinum' OR 'indomethagan'/exp OR 'indomethagan' OR 'indometicina mckesson'/exp OR 'indometicina mckesson' OR 'indometin'/exp OR 'indometin' OR 'indometin depot'/exp OR 'indometin depot' OR 'indomexum'/exp OR 'indomexum' OR 'indomin'/exp OR 'indomin' OR 'indono'/exp OR 'indono' OR 'indoptic'/exp OR 'indoptic' OR 'indoptol'/exp OR 'indoptol' OR 'indorektal'/exp OR 'indorektal' OR 'indorem'/exp OR 'indorem' OR 'indos'/exp OR 'indos' OR 'indosan'/exp OR 'indosan' OR 'indosima'/exp OR 'indosima' OR 'indosmos'/exp OR 'indosmos' OR 'indotard'/exp OR 'indotard' OR 'indovis'/exp OR 'indovis' OR 'indoxen'/exp OR 'indoxen' OR 'indoy'/exp OR 'indoy' OR 'indren'/exp OR 'indren' OR 'indrenin'/exp OR 'indrenin' OR 'indylon'/exp OR 'indylon' OR 'inflazon'/exp OR 'inflazon' OR 'inmetsin'/exp OR 'inmetsin' OR 'inteban'/exp OR 'inteban' OR 'lauzit'/exp OR 'lauzit' OR 'luiflex'/exp OR 'luiflex' OR 'lyo indometacin trihydrate'/exp OR 'lyo indometacin trihydrate' OR 'malival'/exp OR 'malival' OR 'malival ap'/exp OR 'malival ap' OR 'mcn r 1166'/exp OR 'mcn r 1166' OR 'mcn r1166'/exp OR 'mcn r1166' OR 'metacen'/exp OR 'metacen' OR 'methacin'/exp OR 'methacin' OR 'methindol'/exp OR 'methindol' OR 'methindole'/exp OR 'methindole' OR 'methocaps'/exp OR 'methocaps' OR 'metindol'/exp OR 'metindol' OR 'mezolin'/exp OR 'mezolin' OR 'miometacen'/exp OR 'miometacen' OR 'mk 615'/exp OR 'mk 615' OR 'mk615'/exp OR 'mk615' OR 'mobilan'/exp OR 'mobilan' OR 'novomethacin'/exp OR 'novomethacin' OR 'osmogit'/exp OR 'osmogit' OR 'osmosin'/exp OR 'osmosin' OR 'reumacid'/exp OR 'reumacid' OR 'reusin'/exp OR 'reusin' OR 'rheumacid'/exp OR 'rheumacid' OR 'rheumacin'/exp OR 'rheumacin' OR 'rheumacin sr'/exp OR 'rheumacin sr' OR 'salinac'/exp OR 'salinac' OR 'servimeta'/exp OR 'servimeta' OR 'sidocin'/exp OR 'sidocin' OR 'tannex'/exp OR 'tannex' OR 'taye'/exp OR 'taye' OR 'tivorbex'/exp OR 'tivorbex' OR 'vi-gel'/exp OR 'vi-gel' OR 'vonum'/exp OR 'vonum') |

**Table S1 (continue)**

| <b>Database</b>              | <b>Syntax</b>                                                                                                                                |
|------------------------------|----------------------------------------------------------------------------------------------------------------------------------------------|
| Ovid<br>MEDLINE<br>n = 123   | ((gout or gouty or Gouty arthritis or uric arthritis or arthralgia) and Etoricoxib and (indometacin or indomethacin)).af.                    |
| PubMed<br>n = 13             | (((((((gout) OR gouty) OR Gouty arthritis) OR uric arthritis) OR arthralgia)) AND Etoricoxib) AND indometacin                                |
| Science-<br>Direct<br>n = 33 | (gout OR gouty OR Gouty arthritis OR uric arthritis OR arthralgia AND Etoricoxib) and ((indometacin OR indomethacin))                        |
| Web of<br>Science<br>n = 32  | TOPIC: ((gout OR gouty OR Gouty arthritis OR uric arthritis OR arthralgia)) AND TOPIC: (Etoricoxib) AND TOPIC: (indometacin OR indomethacin) |

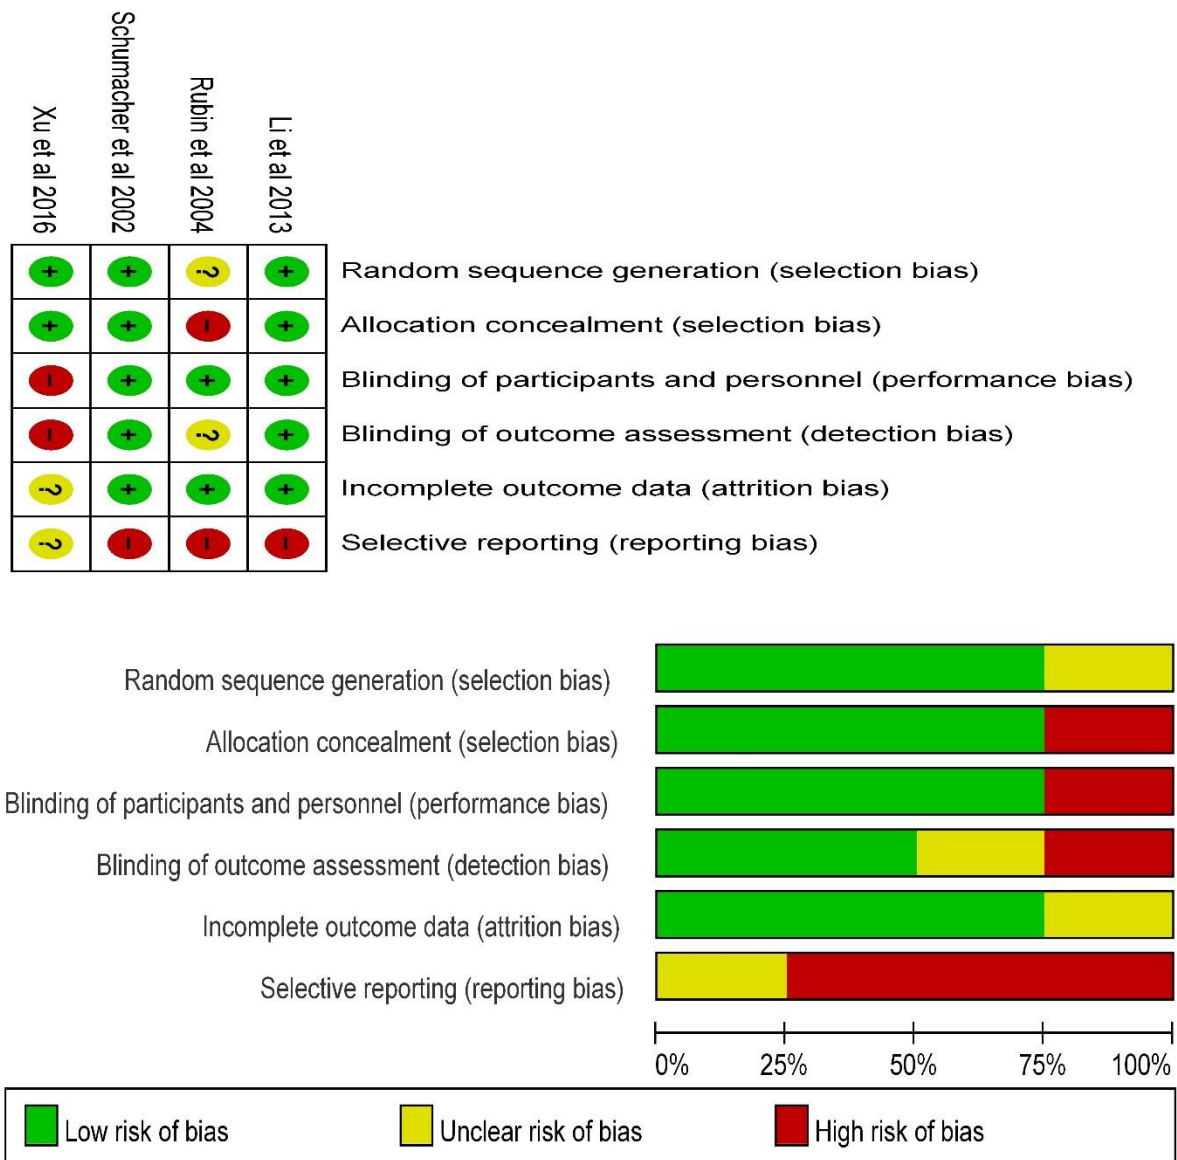

Figure S1 Risk of bias summary.

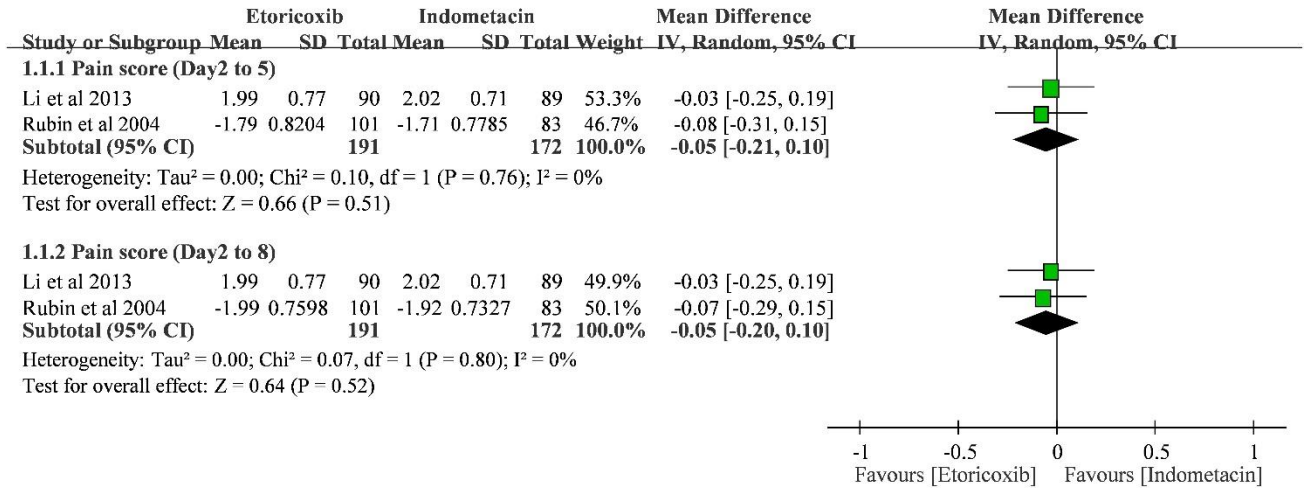

**Figure S2** Forest plot of meta-analysis for pain score between etoricoxib and indometacin.

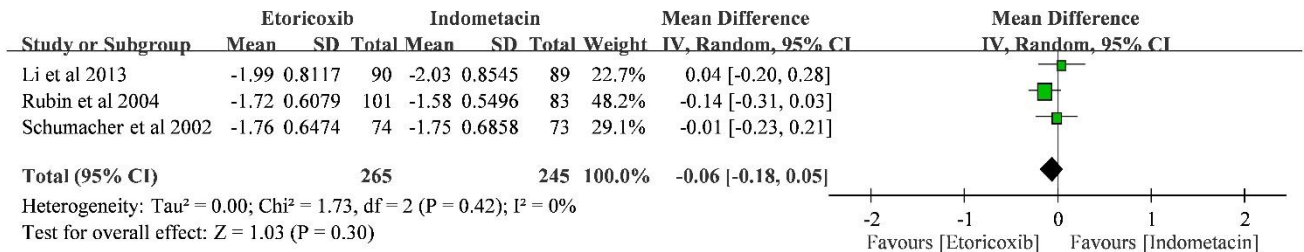

**Figure S3** Forest plot of meta-analysis for tenderness between etoricoxib and indometacin.

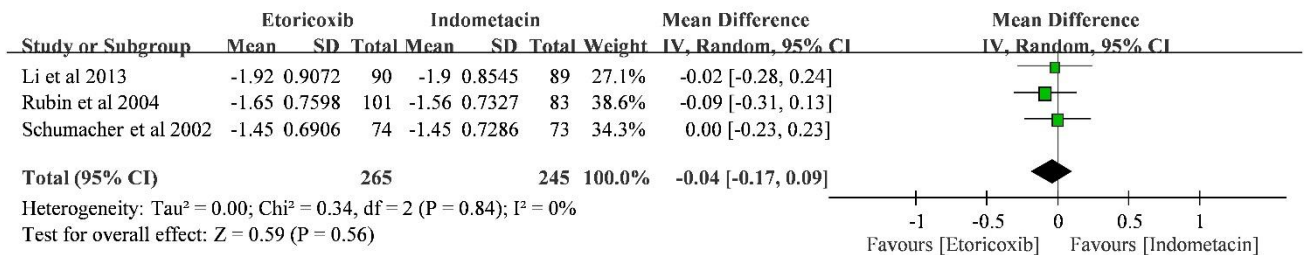

**Figure S4** Forest plot of meta-analysis for swelling between etoricoxib and indometacin.

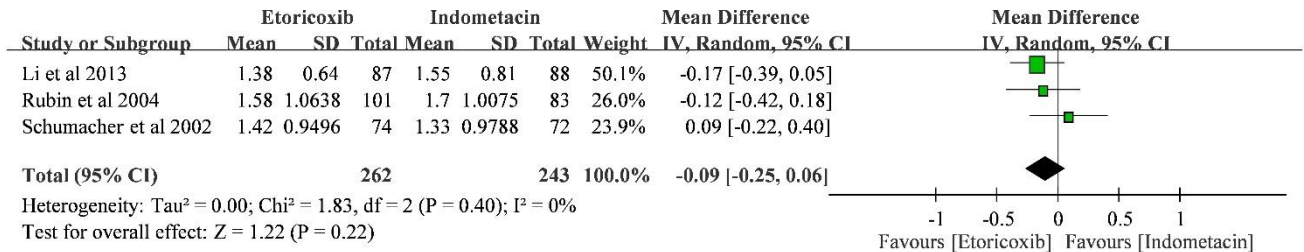

**Figure S5** Forest plot of meta-analysis for patient's global assessment between etoricoxib and indometacin.

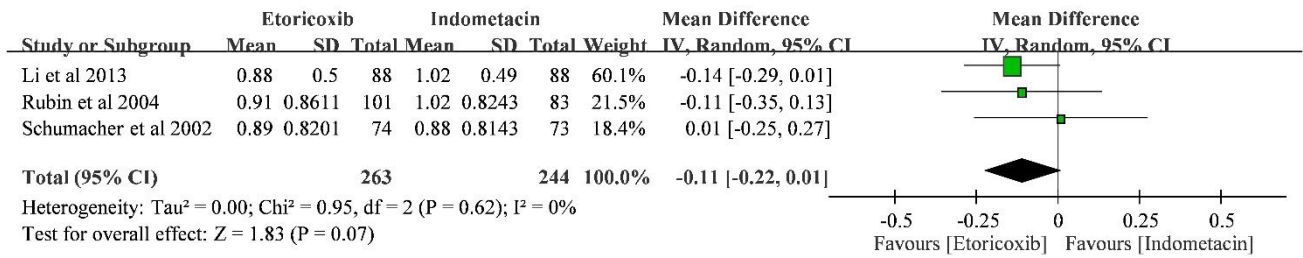

**Figure S6** Forest plot of meta-analysis for investigator's global assessment between etoricoxib and indometacin.

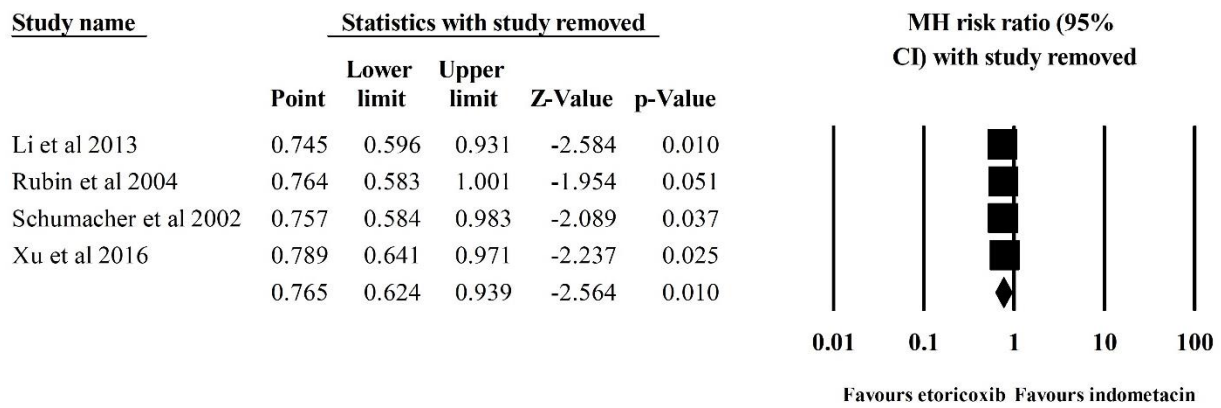

**Figure S7** Forest plot of sensitivity analysis for overall adverse event between etoricoxib and indometacin.

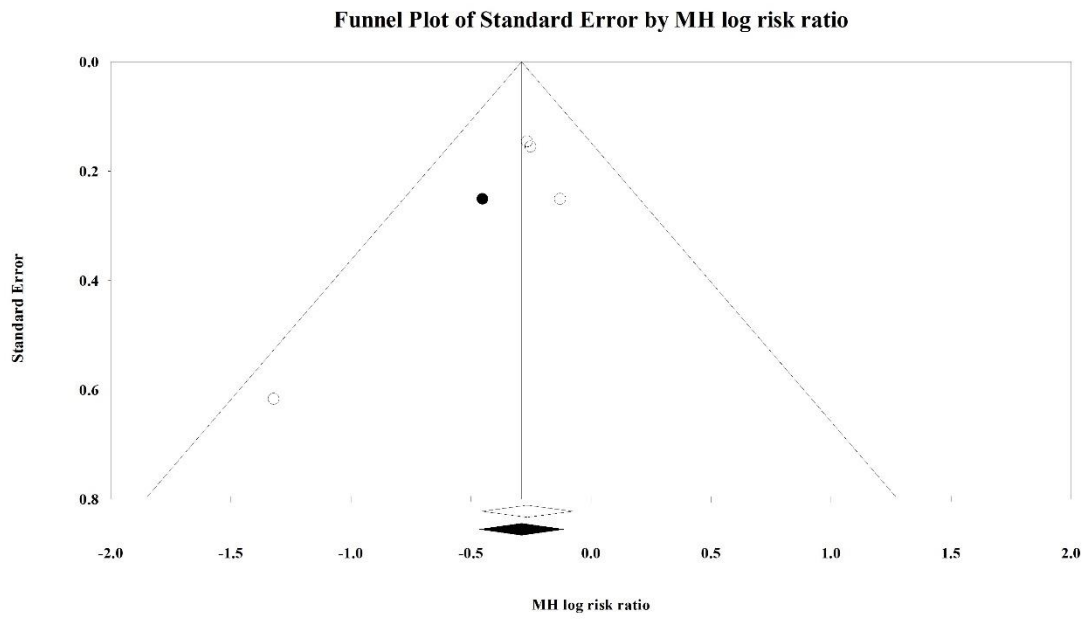

**Egger's regression intercept**

|                            |          |
|----------------------------|----------|
| Intercept                  | -1.62372 |
| Standard error             | 1.06609  |
| 95% lower limit (2-tailed) | -6.21075 |
| 95% upper limit (2-tailed) | 2.96332  |
| t-value                    | 1.52305  |
| df                         | 2.00000  |
| P-value (1-tailed)         | 0.13360  |
| P-value (2-tailed)         | 0.26720  |

**Figure S8** Funnel plot for overall adverse event.
